# Supplementary material for: Mathematical Modeling of Interleukin-27 Induction of Anti-Tumor T Cells Response
Source: PubMed Central journal article supplement (PMC3954918; doi:10.1371/journal.pone.0091844), 2014-03-14

[PRCC , p-value] = [0.066589 , 2.4459e-006]. [PRCC , p-value] = [-0.30727 , 0].

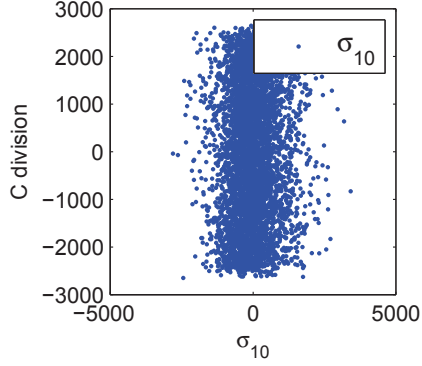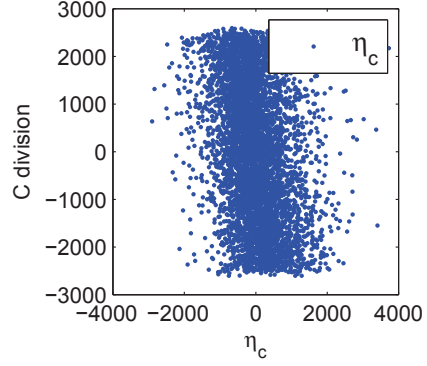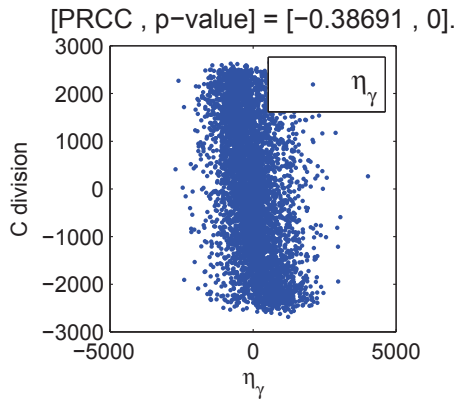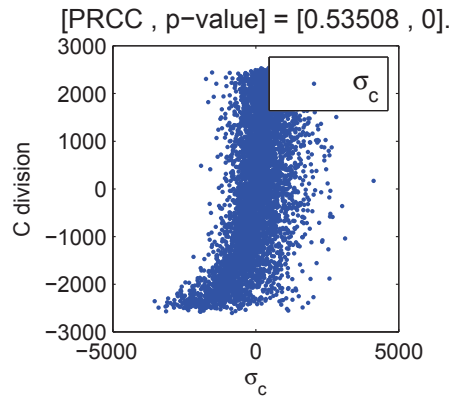

Supplement: pone.0091844.s002.pdf [file pone.0091844.s002.pdf]
