# Supplementary material for: Mathematical Modeling of Interleukin-27 Induction of Anti-Tumor T Cells Response
Source: PubMed Central journal article supplement (PMC3954918; doi:10.1371/journal.pone.0091844), 2014-03-14

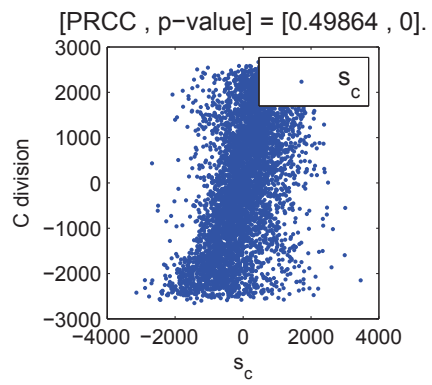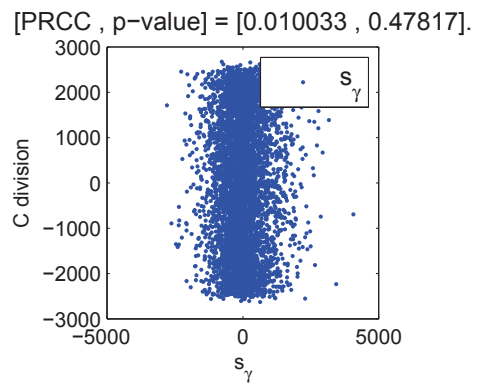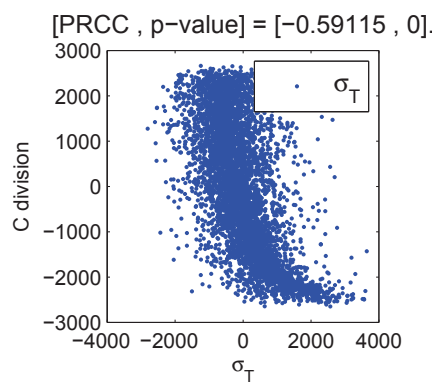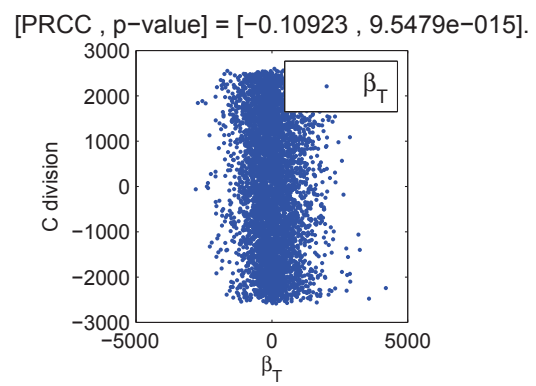

Supplement: pone.0091844.s003.pdf [file pone.0091844.s003.pdf]
